# Supplementary material for: The Mayo Clinic Florida Microdosimetric Kinetic Model of Clonogenic Survival: Application to Various Repair-Competent Rodent and Human Cell Lines
Source: MDPI journal article supplement (doi:10.3390/ijms232012491), 2022-10-18
Supplement: s1 [file s1]

## SUPPLEMENTARY MATERIALS

to

### The Mayo Clinic Florida microdosimetric kinetic model of clonogenic survival: application to various repair-competent rodent and human cell lines

Alessio Parisi \*, Chris J. Beltran, Keith M. Furutani

Department of Radiation Oncology, Mayo Clinic, Jacksonville, Florida, United States of America

\* corresponding author, [parisi.alessio@mayo.edu](mailto:parisi.alessio@mayo.edu)

#### SM1. Morphology of the cell nucleus

The mean radius of the spherical cell nucleus used in the MCF MKM calculations ( $R_n$ ) was derived from the morphologic information of **Table SM1**.

R = radius of the spherical cell nucleus as reported in literature ( $R_n = R$ ).

D = diameter of the spherical cell nucleus as reported in literature ( $R_n = D/2$ ).

A = cross section area of the cell nucleus for fixed cells ( $R_n = \sqrt{\frac{A}{\pi}}$ ).

V = volume of the cell nucleus ( $R_n = \sqrt[3]{\frac{3}{4\pi}V}$ ).

**Table S1.** Morphology of the cell nucleus as reported in literature.

| Cell line abbreviation                                                                                                                           | Reported quantity         | Reference              | Radius of the cell nucleus, $R_n$ [ $\mu\text{m}$ ] | Mean value of $R_n$ [ $\mu\text{m}$ ] |
|--------------------------------------------------------------------------------------------------------------------------------------------------|---------------------------|------------------------|-----------------------------------------------------|---------------------------------------|
| <i>Cell lines included in this article</i>                                                                                                       |                           |                        |                                                     |                                       |
| C3H10T1/2                                                                                                                                        | D = 6-10 $\mu\text{m}$    | Lammerdig, 2011        | 3.0-5.0                                             | 4.0                                   |
| CHO, CHO-K1                                                                                                                                      | A = 108 $\mu\text{m}^2$   | Weyrather et al., 1999 | 4.06                                                | 4.16                                  |
|                                                                                                                                                  | A = 127 $\mu\text{m}^2$   | Konishi et al., 2005   | 4.41                                                |                                       |
|                                                                                                                                                  | V = 265 $\mu\text{m}^3$   | Gacsi et al., 2005     | 3.98                                                |                                       |
| HeLa                                                                                                                                             | V = 690 $\mu\text{m}^3$   | Monier et al., 2000    | 5.48                                                | 5.63                                  |
|                                                                                                                                                  | A = 219 $\mu\text{m}^2$   | Konishi et al., 2005   | 5.79                                                |                                       |
| NB1RGB                                                                                                                                           | A = 172.3 $\mu\text{m}^2$ | Suzuki et al., 2000    | 5.13                                                |                                       |
| <i>Additional cell lines used for the phenomenological correlation between mean DNA content and <math>R_n</math> (Equation 8 of the article)</i> |                           |                        |                                                     |                                       |
| A-172                                                                                                                                            | A = 209.1 $\mu\text{m}^2$ | Suzuki et al., 2000    | 5.66                                                |                                       |
| A-549                                                                                                                                            | A = 182.3 $\mu\text{m}^2$ | Suzuki et al., 2000    | 5.28                                                |                                       |
| AG01522                                                                                                                                          | A = 140 $\mu\text{m}^2$   | Azzam et al., 1998     | 4.63                                                | 4.57                                  |
|                                                                                                                                                  | A = 133 $\mu\text{m}^2$   | Chaudhary et al., 2016 | 4.51                                                |                                       |
| Becker                                                                                                                                           | A = 203.9 $\mu\text{m}^2$ | Suzuki et al., 2000    | 5.58                                                |                                       |
| C32TG                                                                                                                                            | A = 166.6 $\mu\text{m}^2$ | Suzuki et al., 2000    | 5.05                                                |                                       |
| HFL-III                                                                                                                                          | A = 142.9 $\mu\text{m}^2$ | Suzuki et al., 2000    | 4.68                                                |                                       |
| HSG                                                                                                                                              | R(G1) = 4.1 $\mu\text{m}$ | Kase et al., 2006      | 4.47*                                               |                                       |
|                                                                                                                                                  | R(G2) = 5.2 $\mu\text{m}$ | Kase et al., 2006      |                                                     |                                       |
| KNS-60                                                                                                                                           | A = 263.8 $\mu\text{m}^2$ | Suzuki et al., 2000    | 6.35                                                |                                       |
| KNS-89                                                                                                                                           | A = 187.3 $\mu\text{m}^2$ | Suzuki et al., 2000    | 5.35                                                |                                       |
| KS-1                                                                                                                                             | A = 221.4 $\mu\text{m}^2$ | Suzuki et al., 2000    | 5.82                                                |                                       |
| LC-1 sq                                                                                                                                          | A = 230.3 $\mu\text{m}^2$ | Suzuki et al., 2000    | 5.93                                                |                                       |
| Marcus                                                                                                                                           | A = 187.9 $\mu\text{m}^2$ | Suzuki et al., 2000    | 5.36                                                |                                       |
| ONS-76                                                                                                                                           | A = 176.9 $\mu\text{m}^2$ | Suzuki et al., 2000    | 5.20                                                |                                       |
| SF126                                                                                                                                            | A = 150.9 $\mu\text{m}^2$ | Suzuki et al., 2000    | 4.80                                                |                                       |
| SK-MG-1                                                                                                                                          | A = 218.1 $\mu\text{m}^2$ | Suzuki et al., 2000    | 5.78                                                |                                       |
| T98G                                                                                                                                             | A = 282.5 $\mu\text{m}^2$ | Suzuki et al., 2000    | 6.57                                                |                                       |
| U-251MG(KO)                                                                                                                                      | A = 219.9 $\mu\text{m}^2$ | Suzuki et al., 2000    | 5.80                                                |                                       |
| V79                                                                                                                                              | R = 4.0 $\mu\text{m}$     | Kassis et al., 1989    | 4.0                                                 | 3.96                                  |
|                                                                                                                                                  | D = 8.0 $\mu\text{m}$     | Howell et al., 1991    | 4.0                                                 |                                       |
|                                                                                                                                                  | A = 87.8 $\mu\text{m}^2$  | Weyrather et al., 1999 | 3.67                                                |                                       |
|                                                                                                                                                  | A = 113 $\mu\text{m}^2$   | Tracy et al., 2005     | 4.12                                                |                                       |

\* = the average  $R_n$  for the HSG cell line was calculated assuming that asynchronized cell lines can be approximated by a cell population with a 2:1 distribution of cells in G1 and G2 phase (see Parisi et al., 2022).

## SM2. RBE for surviving fractions other than 10%

For better clarity, the comparison between *in vitro* data and *in silico* calculations (MCF MKM and published LEM IV results) was limited to  $\alpha$ ,  $\beta$  and  $RBE_{10\%}$  in **Figures 2-12** of the article. Nonetheless, as shown in a previous work with the MCF MKM (Parisi et al., 2022), the model can compute RBE values for other surviving fractions. For each cell line, **Figures SM1-14** shows examples of RBE values calculated with the MCF MKM for surviving fractions of 50% and 1%. Corresponding *in vitro* data from the Particle Irradiation Data Ensemble (PIDE, Friedrich et al., 2013) are included for comparison.

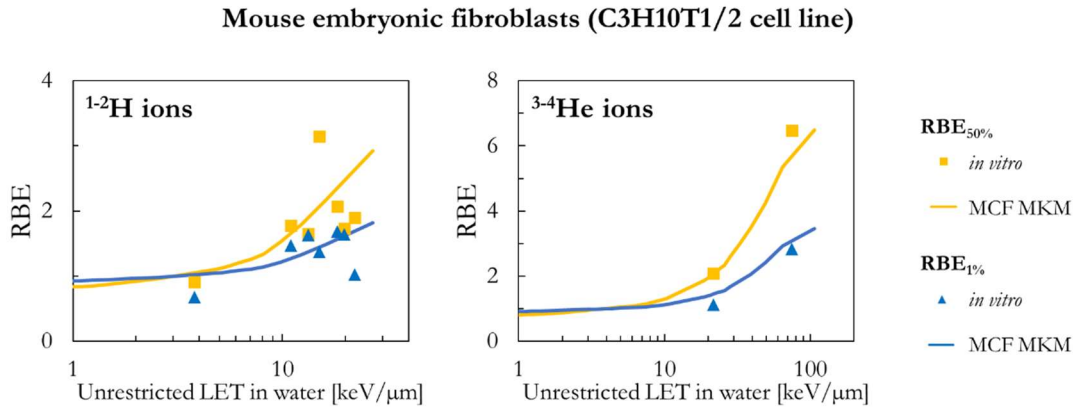

**Figure S1.**  $RBE_{50\%}$  and  $RBE_{1\%}$  for the C3H10T1/2 cell line: MCF MKM predictions compared with published *in vitro* data from PIDE 3.2 (Friedrich et al., 2021).

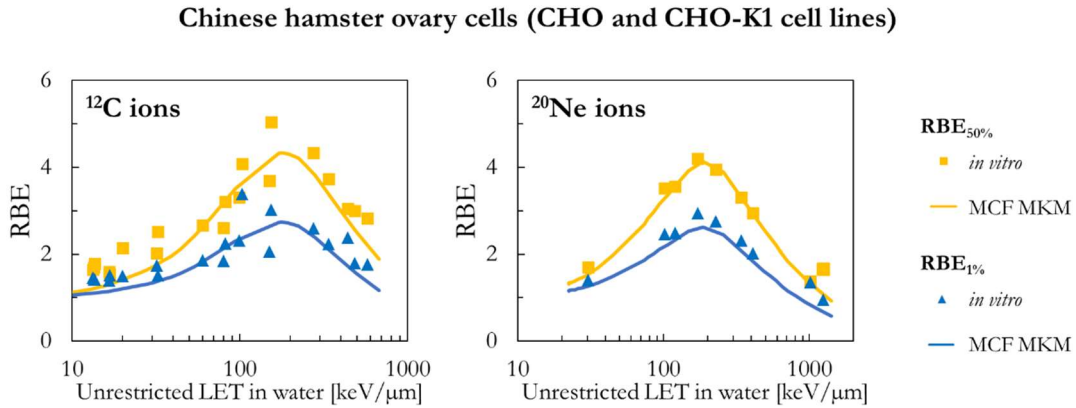

**Figure S2.**  $RBE_{50\%}$  and  $RBE_{1\%}$  for the CHO and CHO-K1 cell lines: MCF MKM predictions compared with published *in vitro* data from PIDE 3.2 (Friedrich et al., 2021).

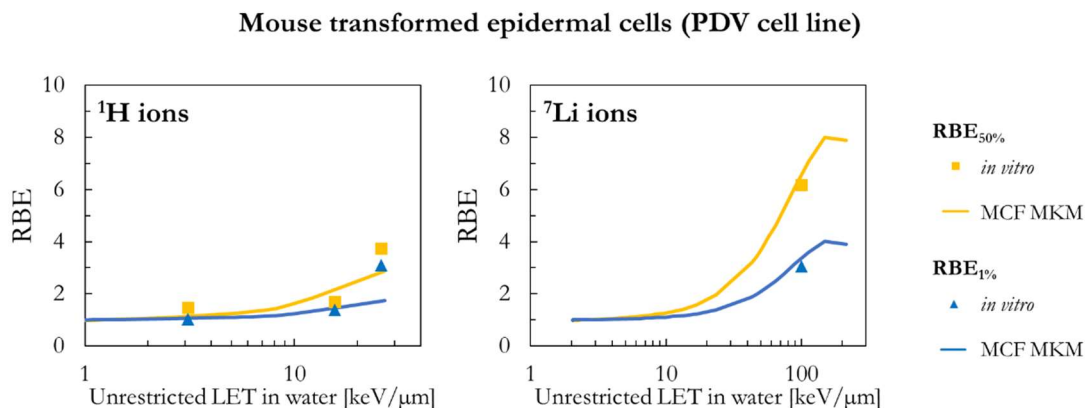

**Figure S3.**  $\text{RBE}_{50\%}$  and  $\text{RBE}_{1\%}$  for the PDV cell line: MCF MKM predictions compared with published *in vitro* data from PIDE 3.2 (Friedrich et al., 2021).

**Rat prostatic adenocarcinoma epithelial cells (RAT-1 cell line)**

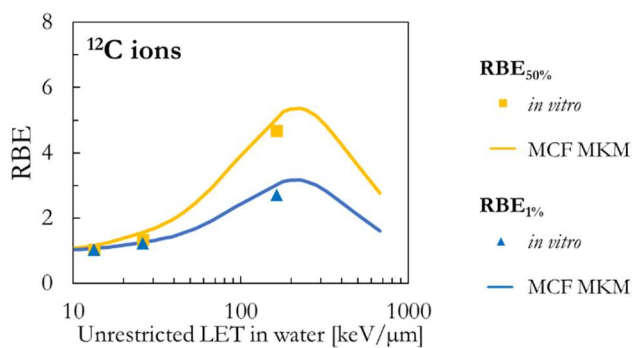

**Figure S4.**  $\text{RBE}_{50\%}$  and  $\text{RBE}_{1\%}$  for the RAT-1 cell line: MCF MKM predictions compared with published *in vitro* data from PIDE 3.2 (Friedrich et al., 2021).

**Human cervical cancer cells (HeLa cell line)**

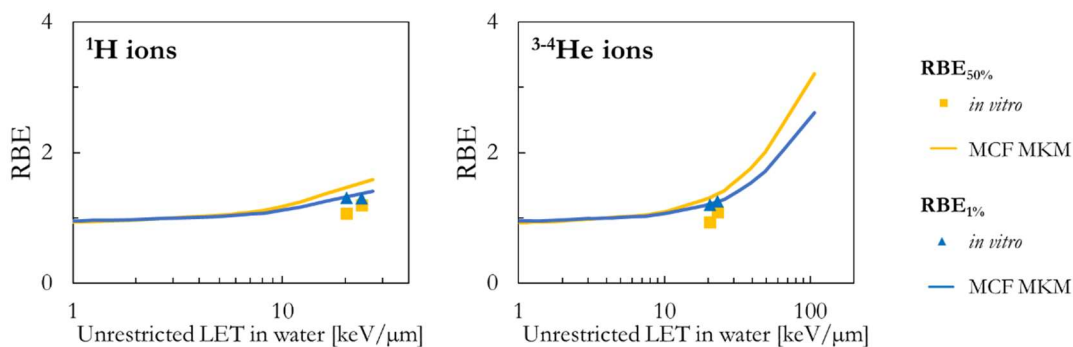

**Figure S5.**  $\text{RBE}_{50\%}$  and  $\text{RBE}_{1\%}$  for the HeLa cell line: MCF MKM predictions compared with published *in vitro* data from PIDE 3.2 (Friedrich et al., 2021).

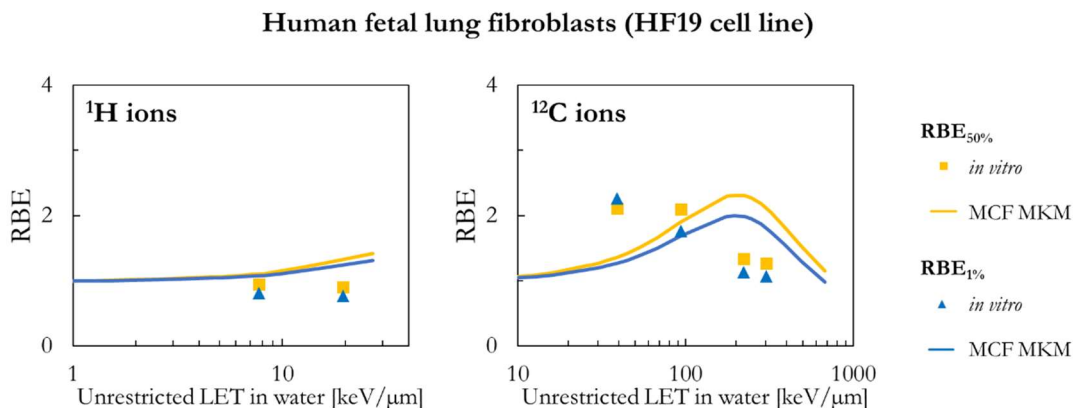

**Figure S6.**  $\text{RBE}_{50\%}$  and  $\text{RBE}_{1\%}$  for the HF-19 cell line: MCF MKM predictions compared with published *in vitro* data from PIDE 3.2 (Friedrich et al., 2021).

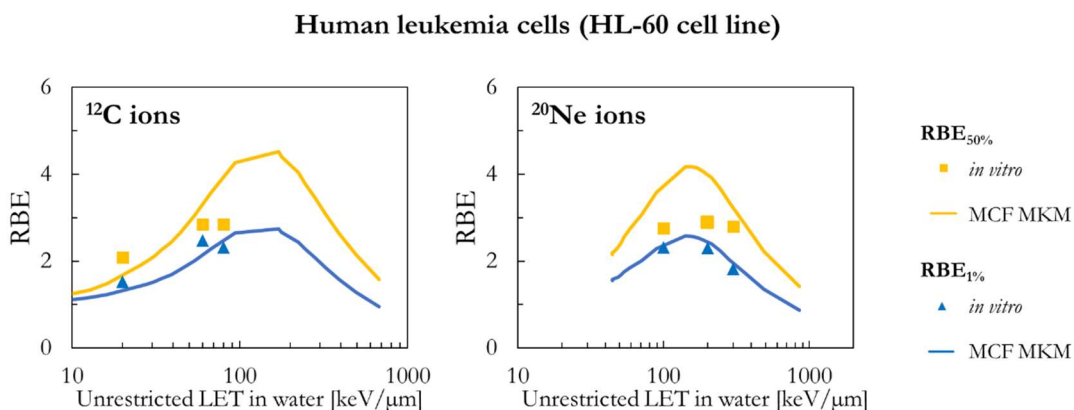

**Figure S7.**  $\text{RBE}_{50\%}$  and  $\text{RBE}_{1\%}$  for the HeLa cell line: MCF MKM predictions compared with published *in vitro* data from PIDE 3.2 (Friedrich et al., 2021).

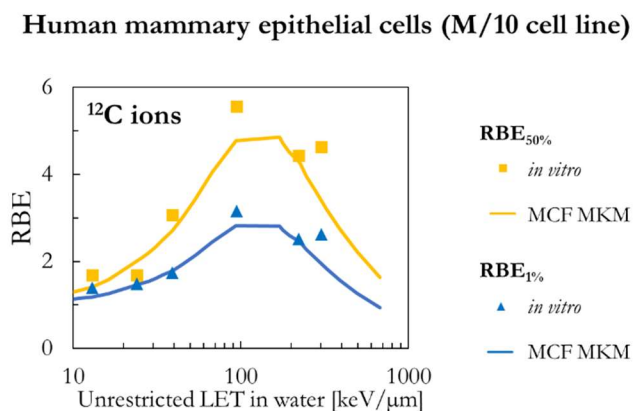

**Figure S8.**  $\text{RBE}_{50\%}$  and  $\text{RBE}_{1\%}$  for the M/10 cell line: MCF MKM predictions compared with published *in vitro* data from PIDE 3.2 (Friedrich et al., 2021).

### Human skin fibroblasts (NB1RGB cell line)

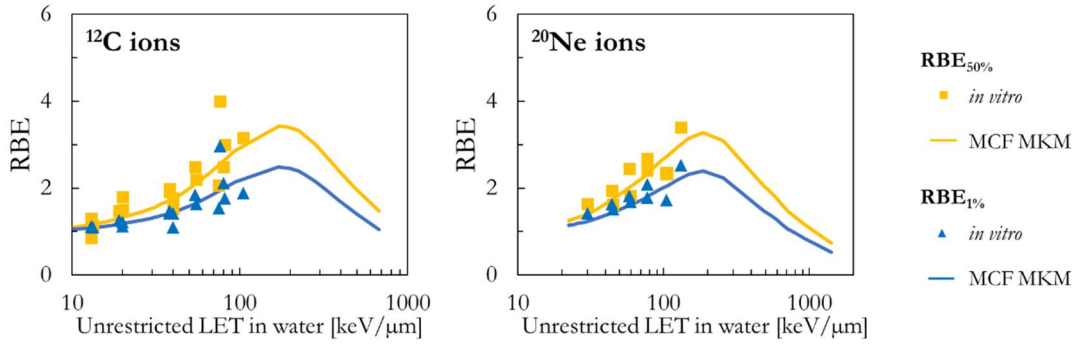

**Figure S9.**  $\text{RBE}_{50\%}$  and  $\text{RBE}_{1\%}$  for the NB1RGB cell line: MCF MKM predictions compared with published *in vitro* data from PIDE 3.2 (Friedrich et al., 2021).

### Human laryngeal squamous cell carcinoma (SQ20B cell line)

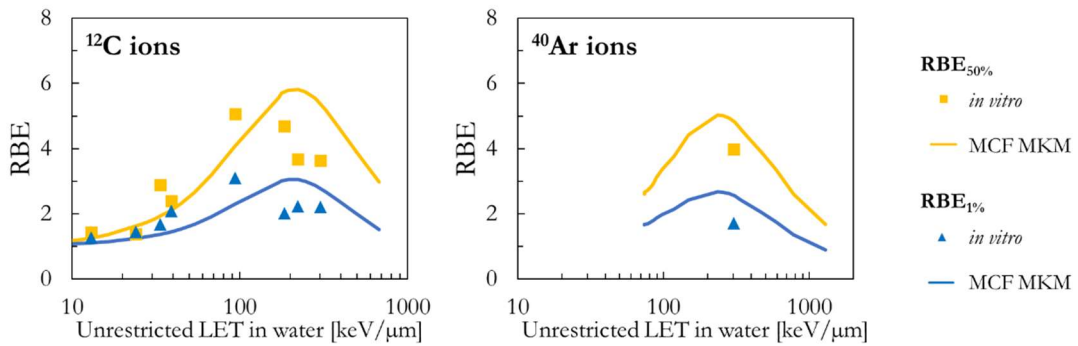

**Figure S10.**  $\text{RBE}_{50\%}$  and  $\text{RBE}_{1\%}$  for the SQ20B cell line: MCF MKM predictions compared with published *in vitro* data from PIDE 3.2 (Friedrich et al., 2021).

### Human kidney cells (T1 cell line)

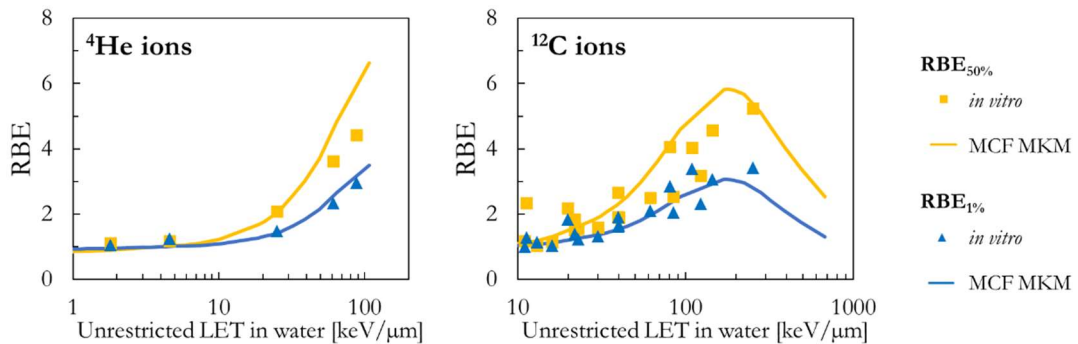

**Figure S11.**  $\text{RBE}_{50\%}$  and  $\text{RBE}_{1\%}$  for the T1 cell line: MCF MKM predictions compared with published *in vitro* data from PIDE 3.2 (Friedrich et al., 2021).

### Human myeloid leukemia cells (TK1 cell line)

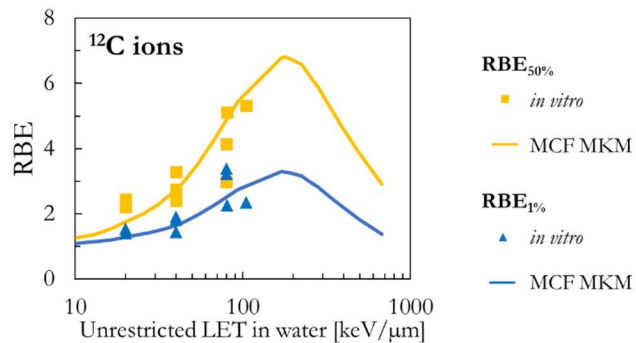

**Figure S12.**  $\text{RBE}_{50\%}$  and  $\text{RBE}_{1\%}$  for the TK1 cell line: MCF MKM predictions compared with published *in vitro* data from PIDE 3.2 (Friedrich et al., 2021).

### Human glioblastoma cells (U-87 cell line)

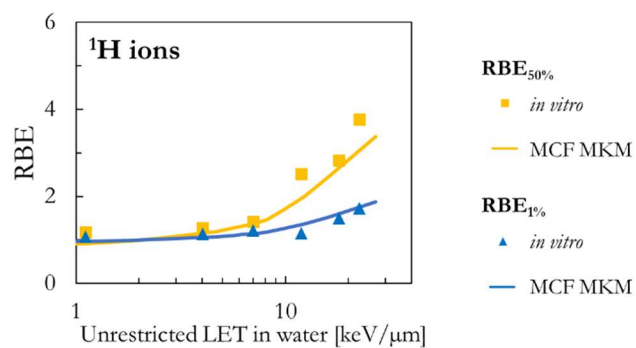

**Figure S13.**  $\text{RBE}_{50\%}$  and  $\text{RBE}_{1\%}$  for the U-87 cell line: MCF MKM predictions compared with published *in vitro* data from PIDE 3.2 (Friedrich et al., 2021).

### Human astrocytoma cells (U-251MG cell line)

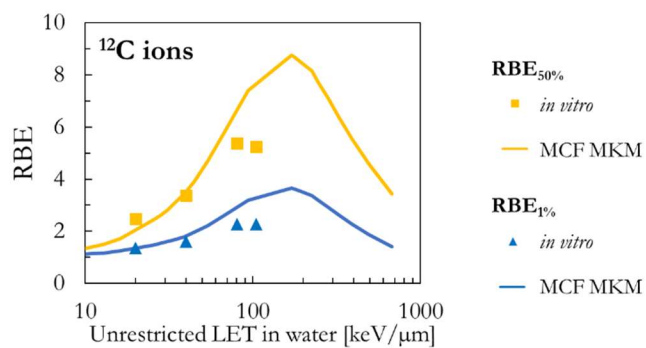

**Figure S14.**  $\text{RBE}_{50\%}$  and  $\text{RBE}_{1\%}$  for the U-251MG cell line: MCF MKM predictions compared with published *in vitro* data from PIDE 3.2 (Friedrich et al., 2021).

### SM3. $RBE_\alpha$ for the U-251MG cell line

As discussed at the end of the **Discussion** section of the article, the *in vitro* data from PIDE (Friedrich et al., 2013) for the human astrocytoma cells (U-251MG cell line) are characterized by a relatively low value of  $\alpha_{ref}$ , but relatively large values of  $\alpha$  after exposures to  $^{12}\text{C}$  ions. Therefore, large values of  $RBE_\alpha$  ( $RBE_\alpha = \alpha/\alpha_{ref}$ ) were obtained, as shown in **Figure SM15**.

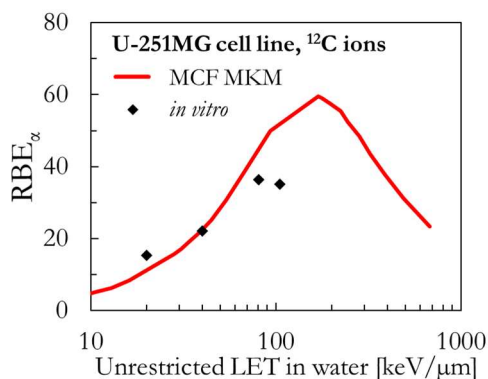

**Figure S15.**  $RBE_\alpha$  for the U-251MG cell line: comparison between MKM MCF predictions and *in vitro* data.

### References

- Azzam, E.I., De Toledo, S.M., Gooding, T. and Little, J.B., 1998. Intercellular communication is involved in the bystander regulation of gene expression in human cells exposed to very low fluences of alpha particles. *Radiation research*, 150(5), pp.497-504.
- Chaudhary, P., Marshall, T.I., Currell, F.J., Kacpersek, A., Schettino, G. and Prise, K.M., 2016. Variations in the processing of DNA double-strand breaks along 60-MeV therapeutic proton beams. *International Journal of Radiation Oncology\* Biology\* Physics*, 95(1), pp.86-94.
- Friedrich, T., Scholz, U., Elsässer, T., Durante, M. and Scholz, M., 2013. Systematic analysis of RBE and related quantities using a database of cell survival experiments with ion beam irradiation. *Journal of radiation research*, 54(3), pp.494-514.
- Gacsi, M., Nagy, G., Pinter, G., Basnakian, A.G. and Banfalvi, G., 2005. Condensation of interphase chromatin in nuclei of synchronized Chinese hamster ovary (CHO-K1) cells. *DNA and cell biology*, 24(1), pp.43-53.
- Howell, R.W., Rao, D.V., Hou, D.Y., Narra, V.R. and Sastry, K.S., 1991. The question of relative biological effectiveness and quality factor for Auger emitters incorporated into proliferating mammalian cells. *Radiation research*, 128(3), pp.282-292.
- Kase, Y., Kanai, T., Matsumoto, Y., Furusawa, Y., Okamoto, H., Asaba, T., Sakama, M. and Shinoda, H., 2006. Microdosimetric measurements and estimation of human cell survival for heavy-ion beams. *Radiation research*, 166(4), pp.629-638.
- Kassis, A.I., Fayad, F., Kinsey, B.M., Sastry, K.S. and Adelstein, S.J., 1989. Radiotoxicity of an  $^{125}\text{I}$ -labeled DNA intercalator in mammalian cells. *Radiation research*, 118(2), pp.283-294.



- Konishi, T., Takeyasu, A., Yasuda, N., Natsume, T., Nakajima, H., Matsumoto, K., Asuka, T., Sato, Y., Furusawa, Y. and Hieda, K., 2005. Number of Fe ion traversals through a cell nucleus for mammalian cell inactivation near the Bragg peak. *Journal of radiation research*, 46(4), pp.415-424.
- Lammerding, J., 2011. Mechanics of the nucleus. *Comprehensive physiology*, 1(2), p.783.
- Monier, K., Armas, J.C.G., Etteldorf, S., Ghazal, P. and Sullivan, K.F., 2000. Annexation of the interchromosomal space during viral infection. *Nature cell biology*, 2(9), pp.661-665.
- Parisi, A., Beltran, C.J. and Furutani, K.M., 2022. The Mayo Clinic Florida microdosimetric kinetic model of clonogenic survival: formalism and first benchmark against in vitro and in silico data. *Physics in Medicine & Biology*, 67(18), p.185013.
- Suzuki, M., Kase, Y., Yamaguchi, H., Kanai, T. and Ando, K., 2000. Relative biological effectiveness for cell-killing effect on various human cell lines irradiated with heavy-ion medical accelerator in Chiba (HIMAC) carbon-ion beams. *International Journal of Radiation Oncology\* Biology\* Physics*, 48(1), pp.241-250.
- Tracy, B.L., Stevens, D.L., Goodhead, D.T. and Hill, M.A., 2015. Variation in RBE for survival of V79-4 cells as a function of alpha-particle (helium ion) energy. *Radiation research*, 184(1), pp.33-45.
- Weyrather, W.K., Ritter, S., Scholz, M. and Kraft, G., 1999. RBE for carbon track-segment irradiation in cell lines of differing repair capacity. *International journal of radiation biology*, 75(11), pp.1357-1364.
